# Supplementary material
Source: Springer Nature journal article supplement (https://www.springerprofessional.de/resource/supplementary/13638_2011_23_MOESM6_ESM.pdf/11897288)

MN      MAP(LMP)      CMP      CN

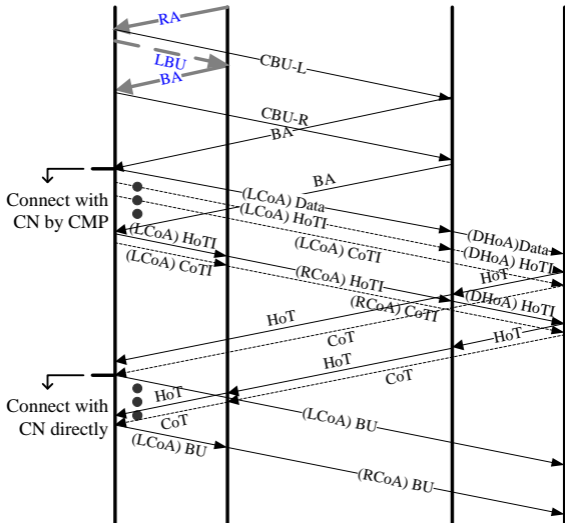

Supplement: MOESM6 [file 11897288]
